# Supplementary material for: Increased cysteinyl-tRNA synthetase drives neuroinflammation in Alzheimer’s disease
Source: Springer Nature journal article supplement (doi:10.1186/s40035-023-00394-6), 2024-01-08
Supplement: MOESM3 [file 40035_2023_394_MOESM3_ESM.pdf]

**Additional file 3**

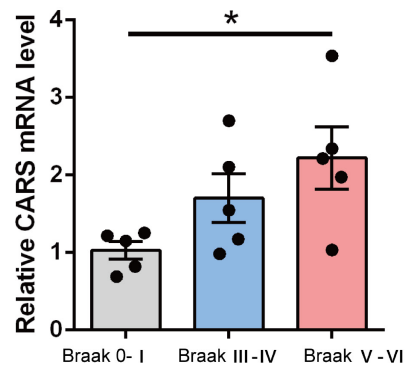

**Fig. S1 Increased CARS mRNA level in the temporal cortex of subjects with AD.** Relative CARS mRNA level in the temporal cortex of subjects with Braak stages. Data are shown as mean  $\pm$  SEM; \* $p < 0.05$ .

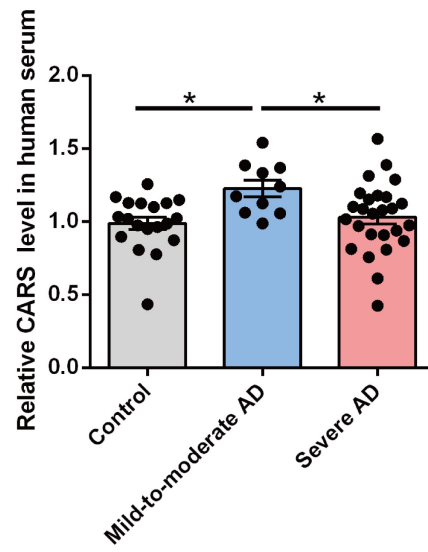

**Fig. S2 Elevated serum CARS level in the mild-to-moderate AD patients.** CARS level in the serum of AD subjects. Data are shown as mean  $\pm$  SEM; \* $p < 0.05$ .

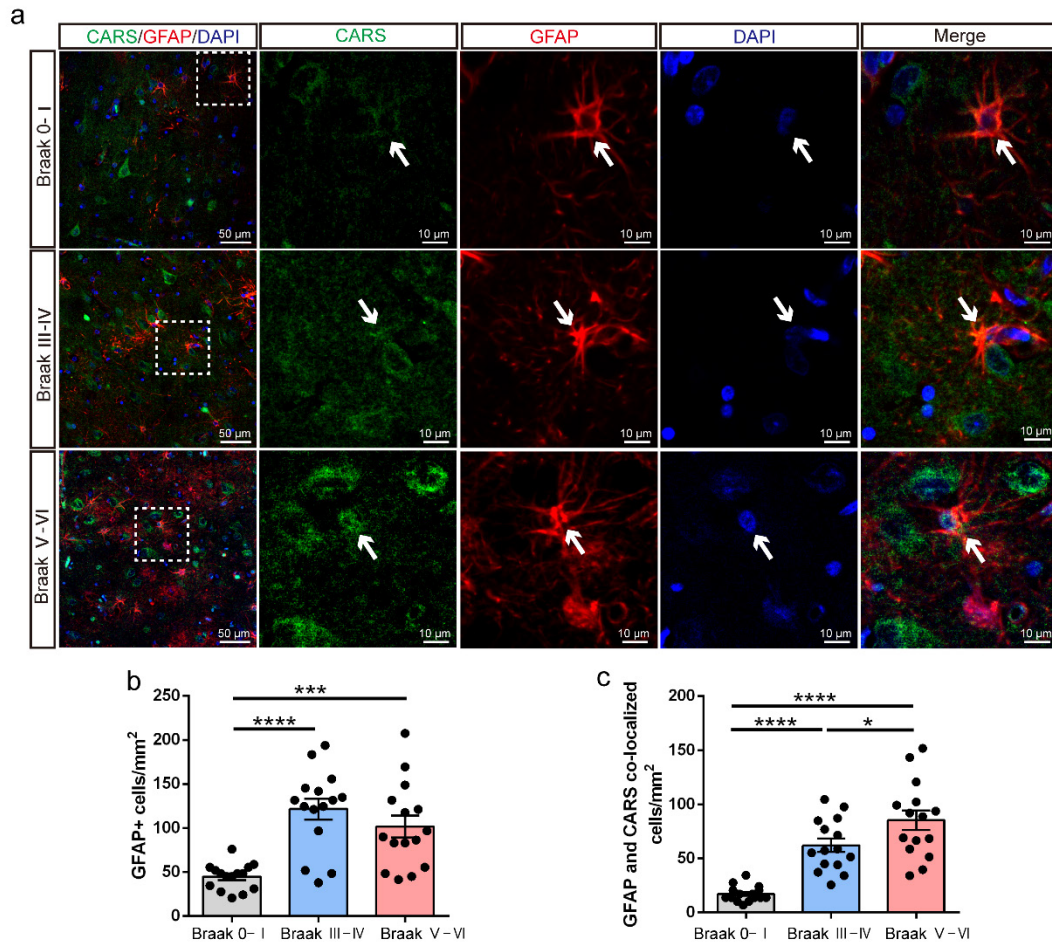

**Fig. S3 The CARS-immunoreactivity (ir) in GFAP positive astrocytes in the temporal cortex of subjects with Braak stages.** **a** Representative images of CARS-ir (green) and GFAP (red) in the temporal cortex of subjects with Braak stages. Magnifications of white dotted boxes are shown in the right four panels. White arrows denote the co-localization of CARS-ir and GFAP. Scale bars: left panels, 50  $\mu\text{m}$ ; right four panels, 10  $\mu\text{m}$ . **b** Quantification of the density of GFAP<sup>+</sup> astrocytes in the temporal cortex of subjects with Braak stages. **c** Quantification of the density of CARS and GFAP co-localized cells in the temporal cortex of subjects with Braak stages. Data are shown as mean  $\pm$  SEM; \* $p < 0.05$ , \*\*\* $p < 0.001$ , \*\*\*\* $p < 0.0001$ .

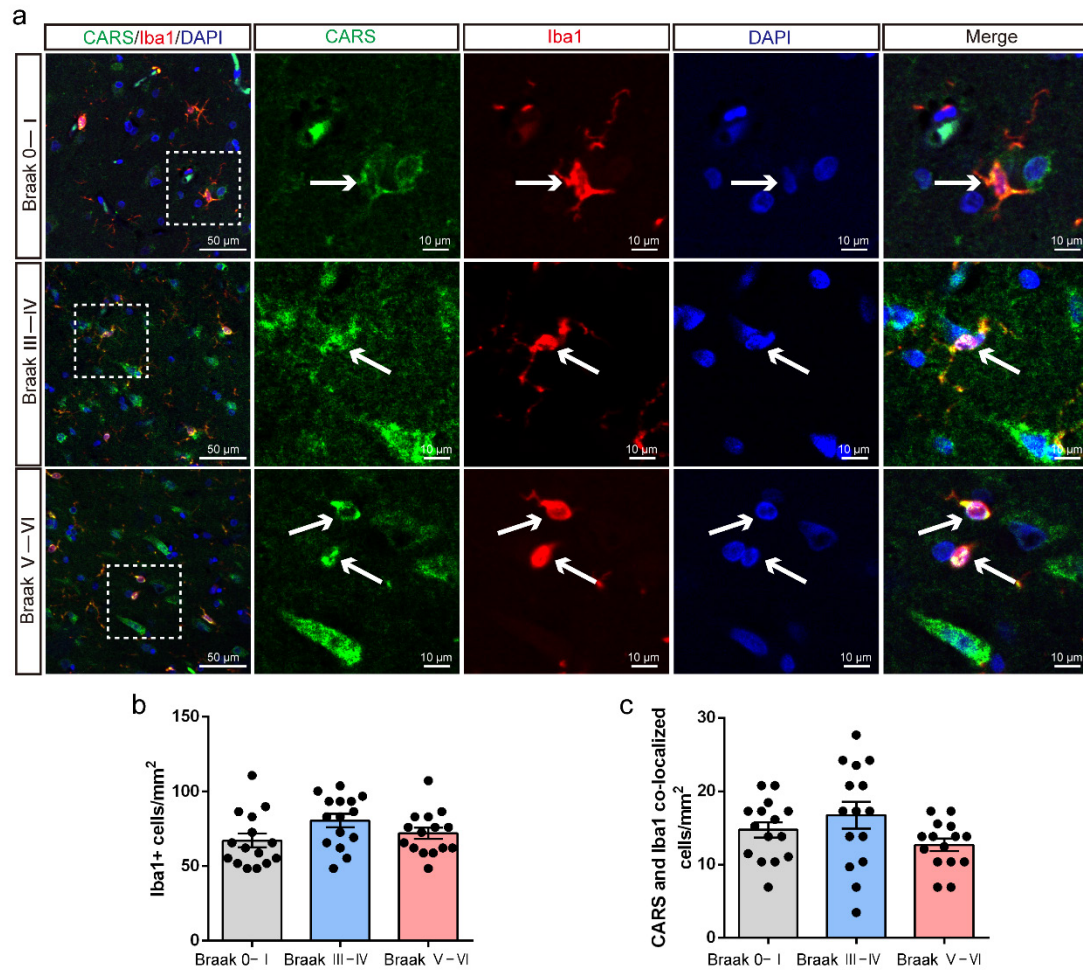

**Fig. S4 The CARS-immunoreactivity in Iba1 positive microglia in the temporal cortex of subjects with Braak stages.** **a** Representative images of CARS-ir (green) and Iba1 (red) in the temporal cortex of subjects with Braak stages. Magnifications of white dotted boxes are shown in the right four panels. White arrows denote the co-localization of CARS-ir and Iba1. Scale bars: left panels, 50  $\mu\text{m}$ ; right four panels, 10  $\mu\text{m}$ . **b** Quantification of the density of Iba1+ microglia in the temporal cortex of subjects with Braak stages. **c** Quantification of the density of CARS and Iba1 co-localized cells in the temporal cortex of subjects with Braak stages. Data are shown as mean  $\pm$  SEM.



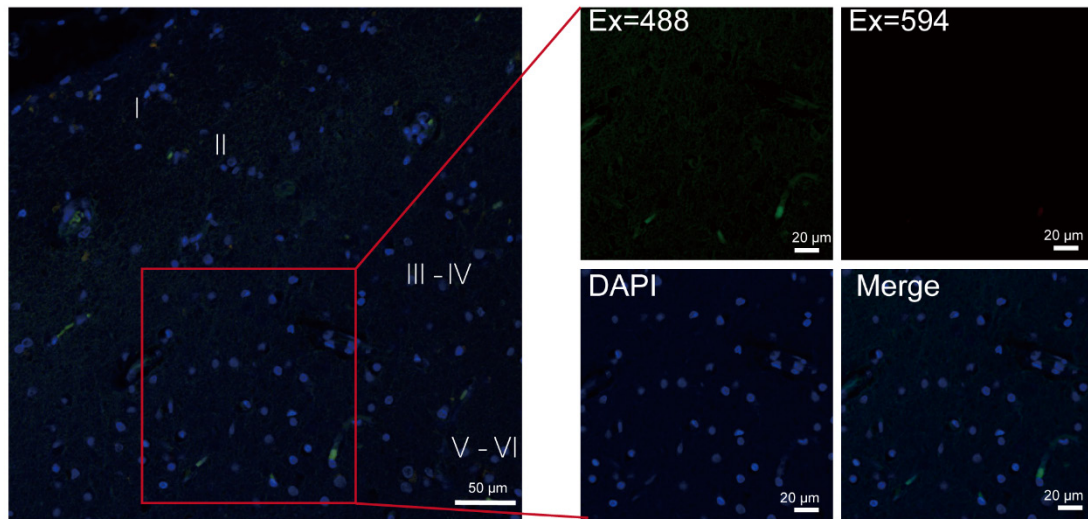

**Fig. S5 The background fluorescence in paraffin sections of human temporal cortex.**

Representative images showing the fluorescence of paraffin sections of human temporal cortex excited 405 nm, 488 nm and 594 nm after staining with Alexa Fluor® 488 AffiniPure Donkey Anti-Rabbit IgG (H+L) antibody and DAPI, respectively. Scale bars: left panel: 50 μm; right four panels: 20 μm.

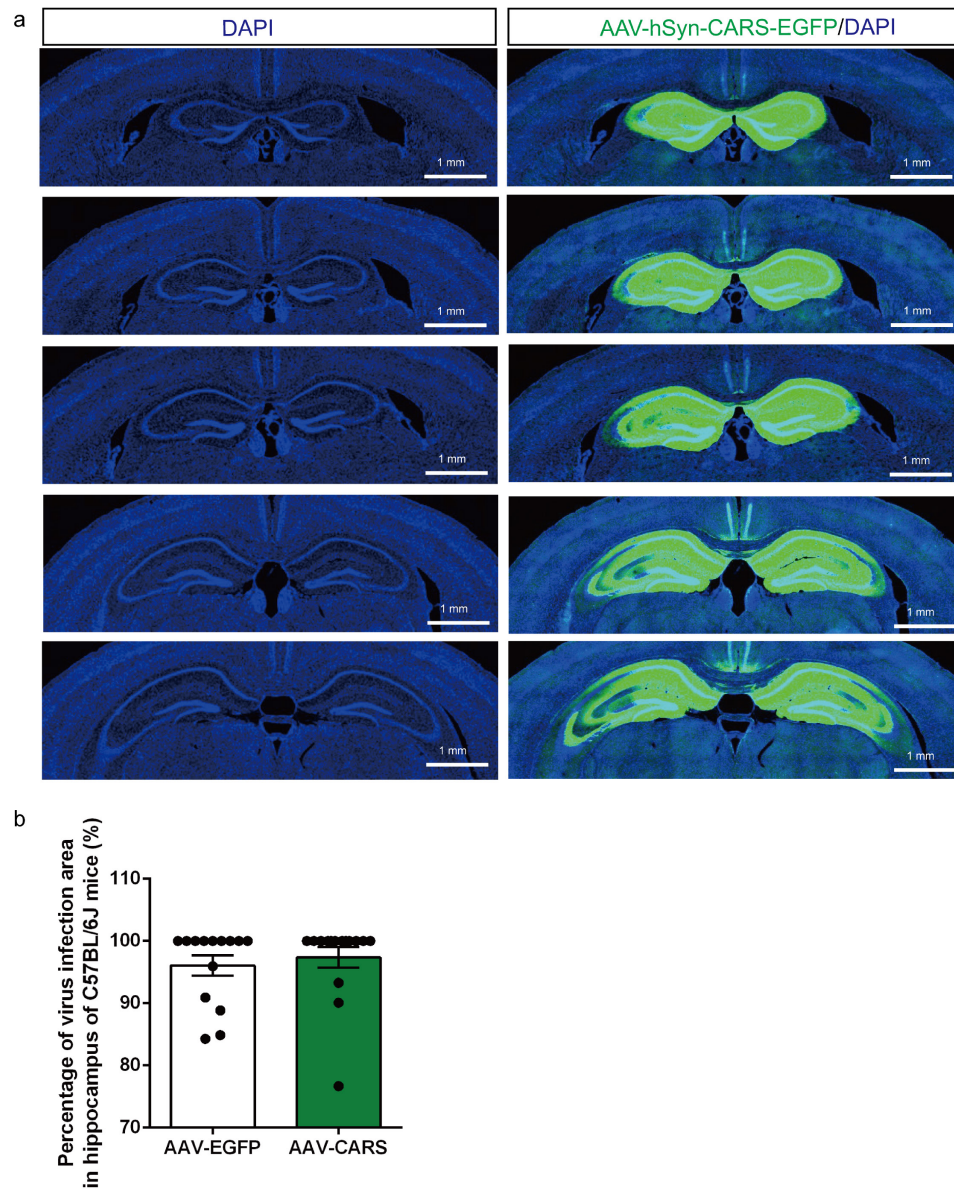

**Fig. S6 The histological map showing area of viral infection in the hippocampus of C57BL/6J mice. a** Example brain slices from a C57BL/6J mouse injected with AAV-hSyn-CARS-EGFP (AAV-CARS) in the hippocampus (left: DAPI; right: AAV-hSyn-CARS-EGFP and DAPI). Scale bars: 1 mm. **b** Percentage of virus infection area in each. Data are shown as mean  $\pm$  SEM.

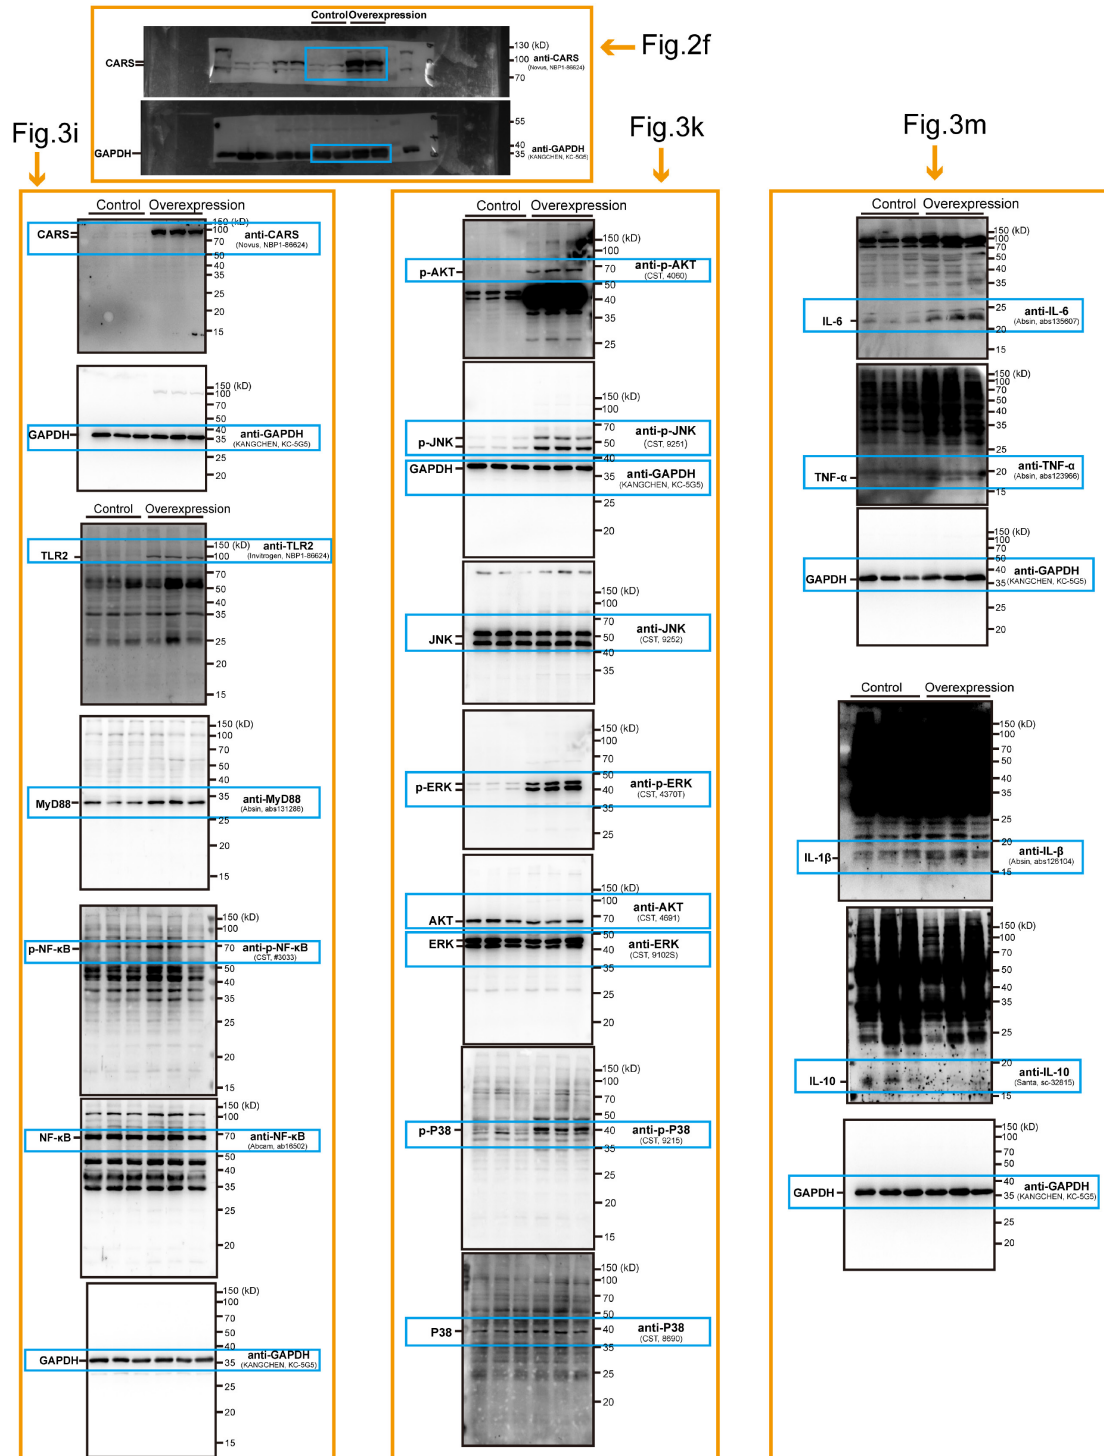

**Fig. S7** The unedited western blotting gels for Fig. 2f, 3i, 3k and 3m.

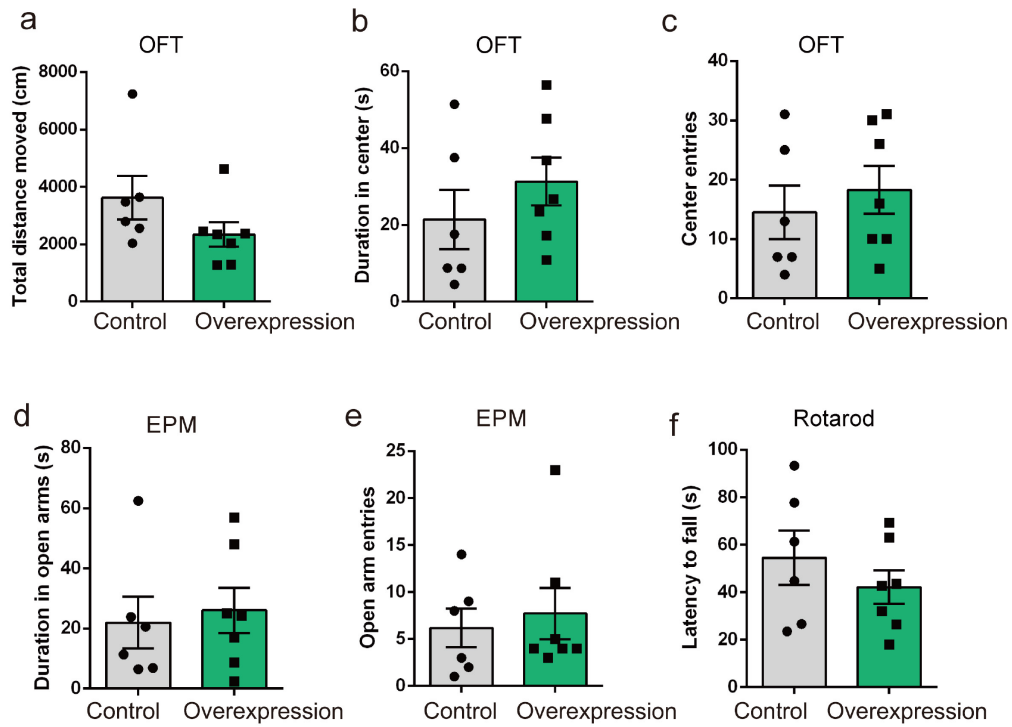

**Fig. S8 Overexpression of CARS in hippocampal neurons of C57BL/6J mice had no effect upon anxiety-like behaviors and motor function.** **a–c** The total distance moved (**a**), time spent (**b**) and entries (**c**) in the center area in the open field test (OFT). **d** and **e** The time (**d**) and entries (**e**) in the open arms in the elevated plus maze (EPM) test. **f** The average latency to fall in the rotarod test. Data are shown as mean  $\pm$  SEM.

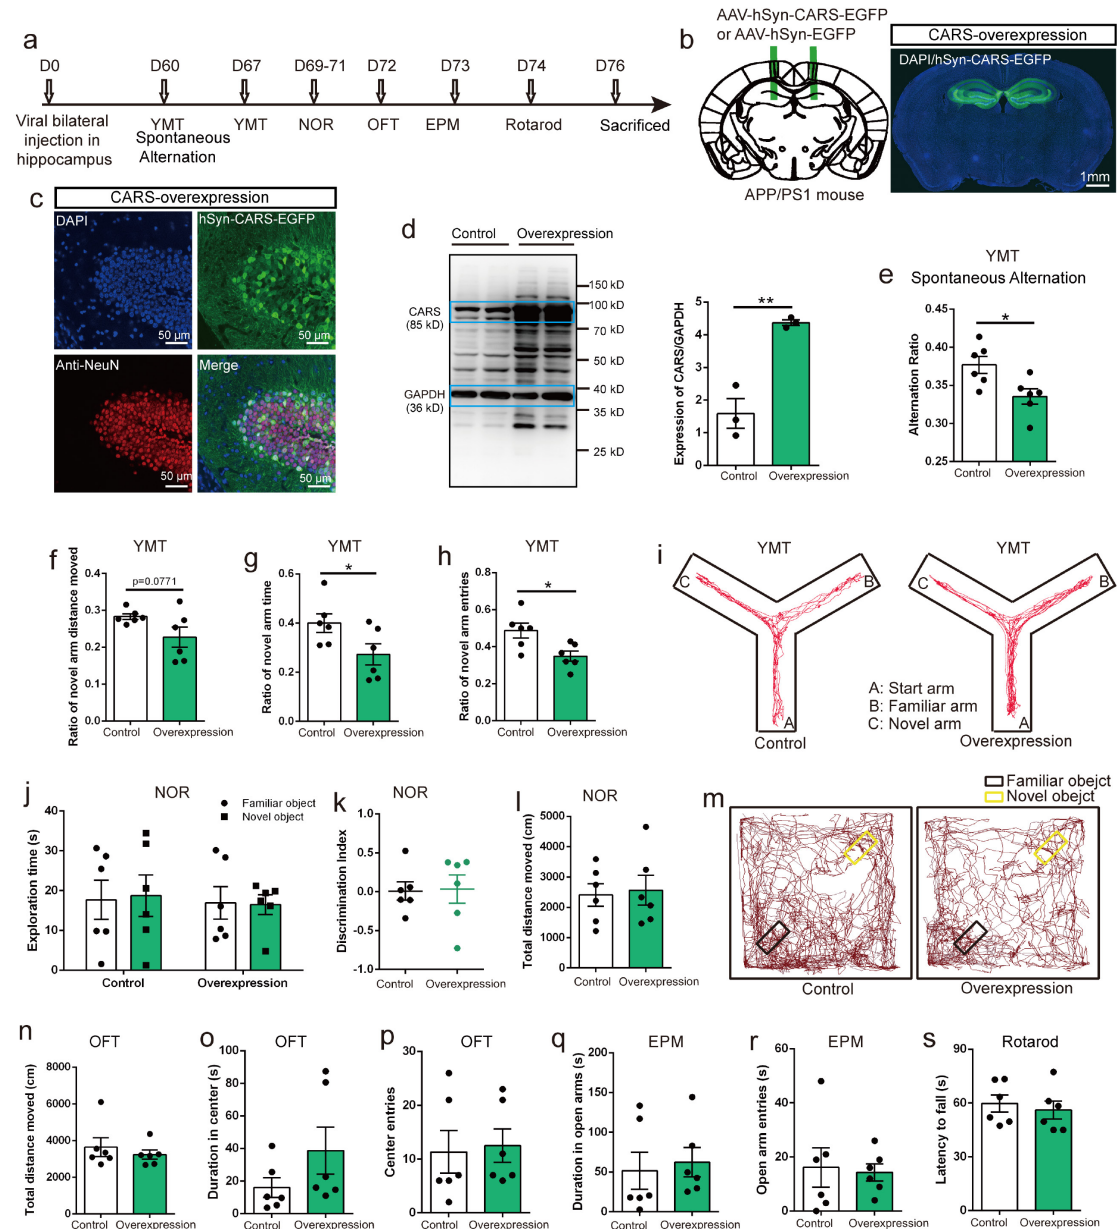

**Fig. S9 Overexpression of CARS in hippocampal neurons exacerbates memory deficit of**

**APP/PS1 mice. a** The schedule of viral injection and the following behavioral tests. **b** Left:

bilateral injection of AAV-hSyn-CARS-EGFP (CARS-overexpression or overexpression) or

AAV-hSyn-EGFP (control) into the hippocampus of APP/PS1 mice. Right: a representative

image of infected hippocampus; scale bar: 1 mm. **c** Immunostaining of NeuN in the

hippocampus after the hSynapsin promoter-driven expression of CARS; scale bars: 50  $\mu$ m. **d**

Left, western blotting of CARS protein expression in the hippocampus of CARS-

overexpression or control mice. Right, quantification of CARS protein expression in the hippocampus. **e** Spontaneous alternation behavior determined by Y-maze test (YMT). **f–h** Ratios of distance moved (**f**), time spent (**g**) and entries (**h**) in the novel arm in the YMT. (**i**) Representative activity traces of control and CARS-overexpression mice in the YMT. **j–l** The exploration time of familiar and novel objects (**j**), discrimination index (**k**) and total distance moved (**l**) in the novel object recognition (NOR) test. **m** Representative activity traces of control and CARS-overexpression mice in the NOR test. **n–p** The total distance moved (**n**), time spent (**o**) and entries (**p**) in the center area in the open field test (OFT). **q** and **r** The time (**q**) and entries (**r**) in the open arms in the elevated plus maze (EPM) test. **s** The average latency to fall in the rotarod test. Data are shown as mean  $\pm$  SEM; \* $p < 0.05$ , \*\* $p < 0.01$ .



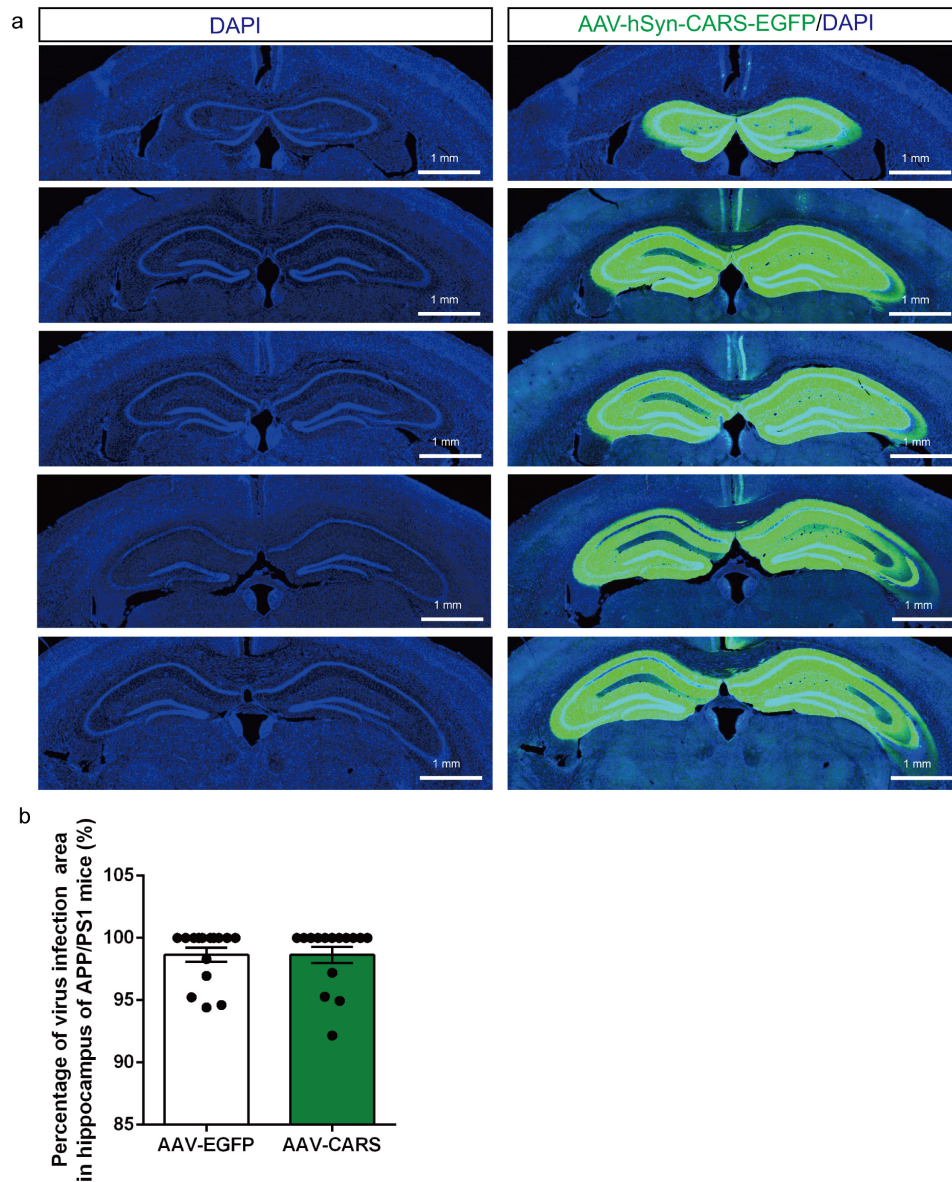

**Fig. S10 The histological map showing area of viral infection in the hippocampus of APP/PS1 mice. a** Example brain slices from a APP/PS1 mouse injected with AAV-hSyn-CARS-EGFP in the hippocampus (left: DAPI; right: AAV-hSyn-CARS-EGFP and DAPI). Scale bars: 1 mm. **b** Percentage of virus infection area in each hippocampus. Data are shown as mean  $\pm$  SEM.

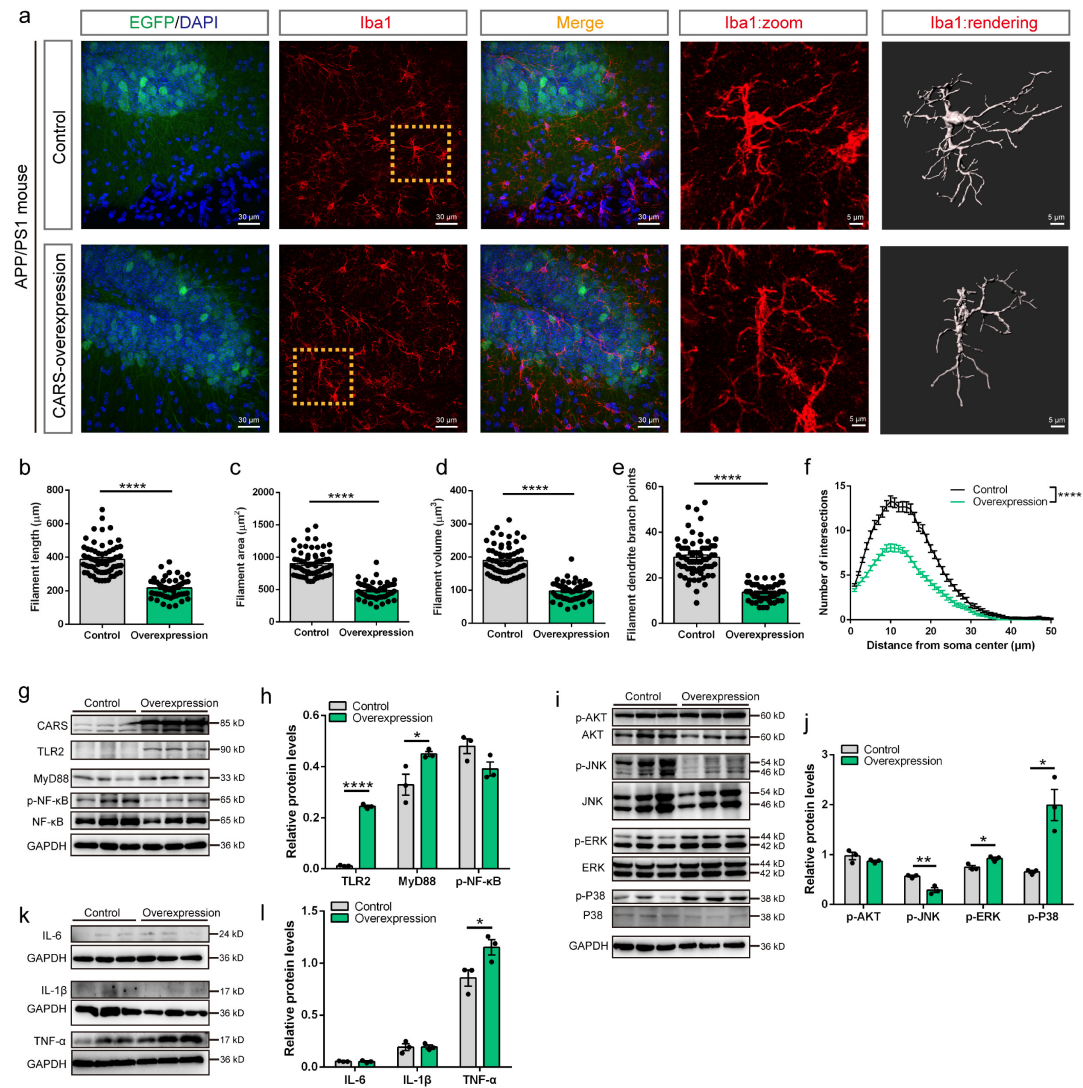

**Fig. S11 Neuronal CARS overexpression induces microglial morphologic changes and activates the TLR2/MyD88 pathway in hippocampus of APP/PS1 mice.** **a** Representative images of Iba1 immunostaining (red) and three-dimensional (3D) reconstruction (gray) of microglia in the hippocampus from APP/PS1 mice treated with AAV-hSyn-CARS-EGFP (CARS-overexpression or overexpression) or AAV-hSyn-EGFP (control). Zoomed in view and rendering are shown in the right two panels respectively. Scale bars: 30  $\mu$ m (overview) and 5  $\mu$ m (zoomed in view and rendering). **b–e** Imaris-based automated quantification of Iba1+ microglial filament length (**b**), filament area (**c**), filament volume (**d**), and numbers of dendrite branch points (**e**) in the hippocampus from control and CARS-overexpression APP/PS1 mice. **f** Sholl analysis of microglial morphology in control and CARS-overexpression APP/PS1 mice.

CARS-overexpression APP/PS1 mice. **g** and **h** Representative western blotting images (**g**) and quantification (**h**) of TLR2, MyD88 and p-NF- $\kappa$ B protein expression in the hippocampus of control and CARS-overexpression APP/PS1 mice. **i** and **j** Representative western blotting images (**i**) and quantification (**j**) of p-AKT, p-JNK, p-ERK and p-P38 protein expression in the hippocampus of control and CARS-overexpression APP/PS1 mice. **k** and **l** Representative western blotting images (**k**) and quantification (**l**) of IL-6, IL-1 $\beta$ , and TNF- $\alpha$  protein expression in the hippocampus of control and CARS-overexpression APP/PS1 mice. Data are shown as mean  $\pm$  SEM; \* $p$  < 0.05, \*\* $p$  < 0.01, \*\*\* $p$  < 0.0001.

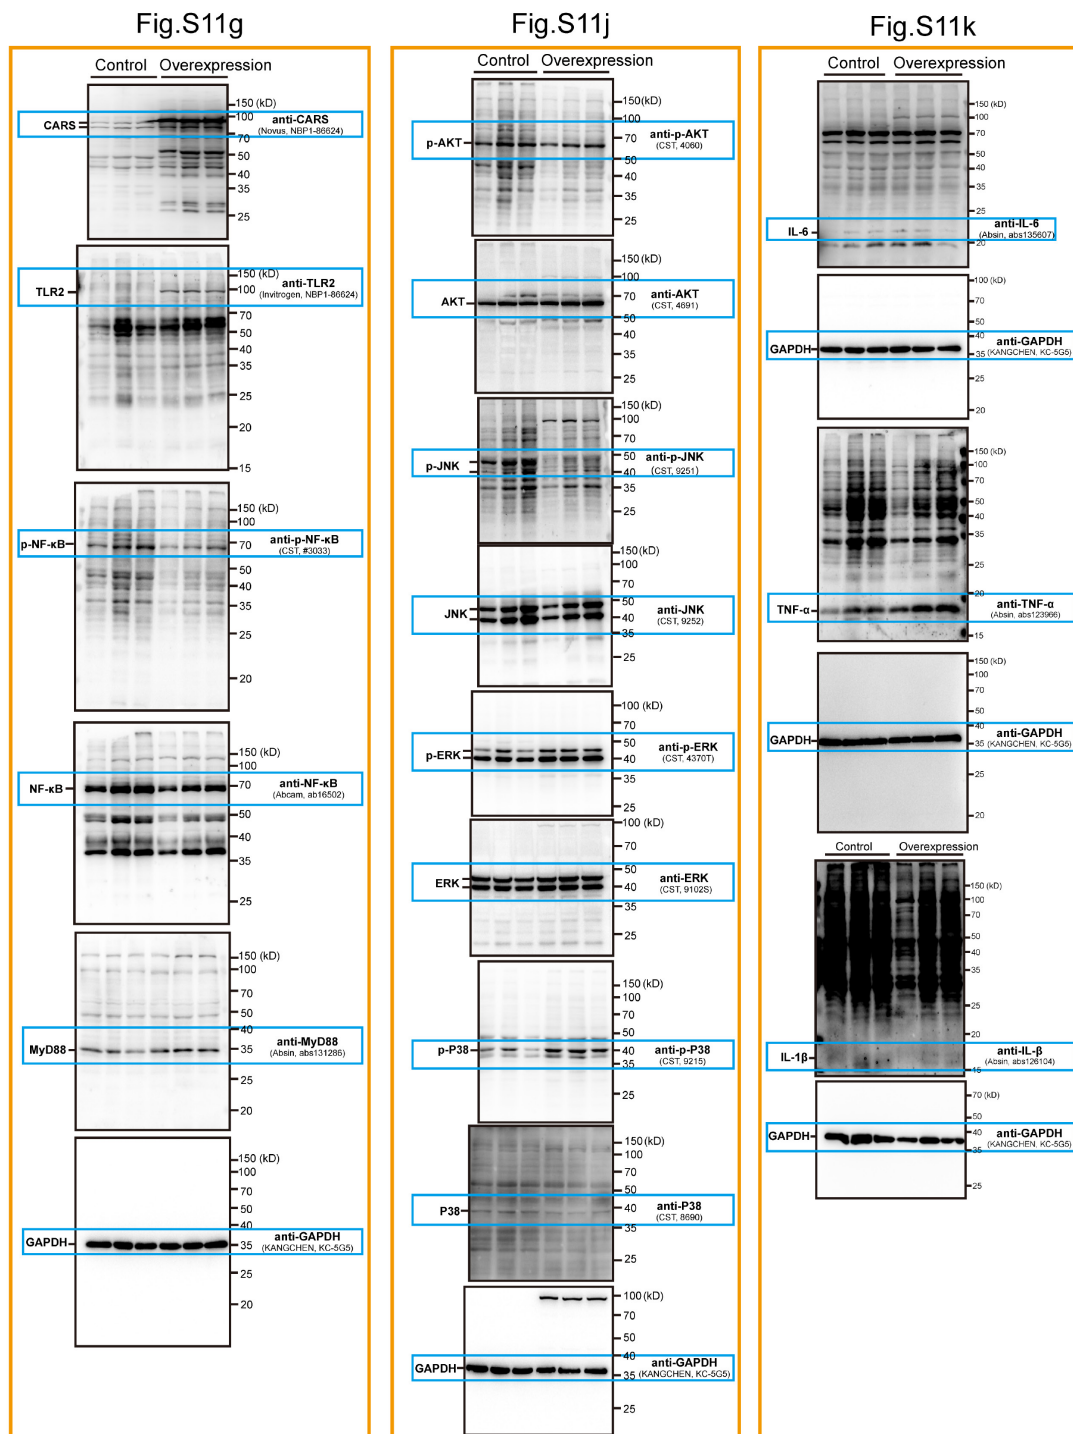

**Fig. S12** The unedited western blotting gels for Fig. S11g, S11j and S11k.

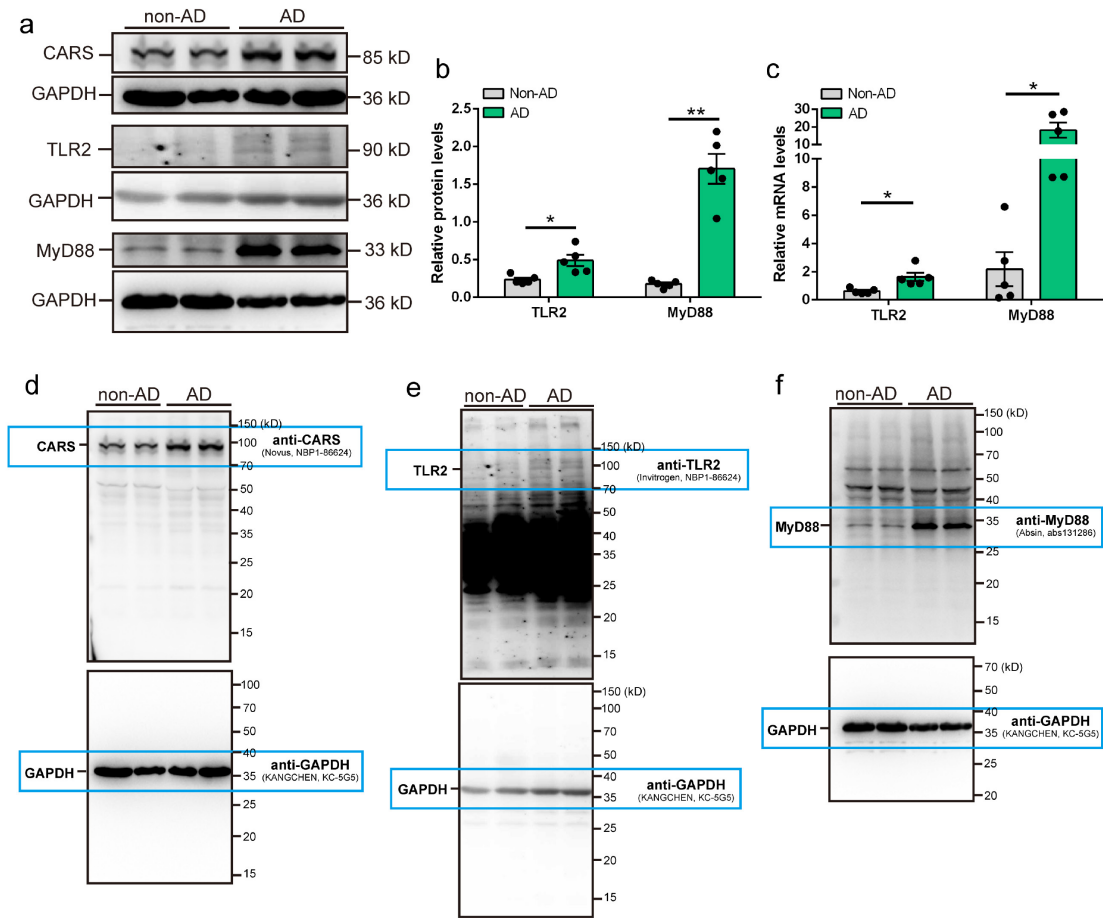

**Fig. S13 Increased protein and mRNA levels of TLR2 and MyD88 in the temporal cortex of subjects with AD.** **a–c** Representative western blotting images of CARS, TLR2 and MyD88 protein expression (**a**), and quantification of TLR2 and MyD88 protein expression (**b**) and mRNA levels (**c**) in the non-AD and AD human temporal cortex. **d–f** The unedited western blotting gels for **a**. Data are shown as mean  $\pm$  SEM; \*p < 0.05, \*\*p < 0.01.



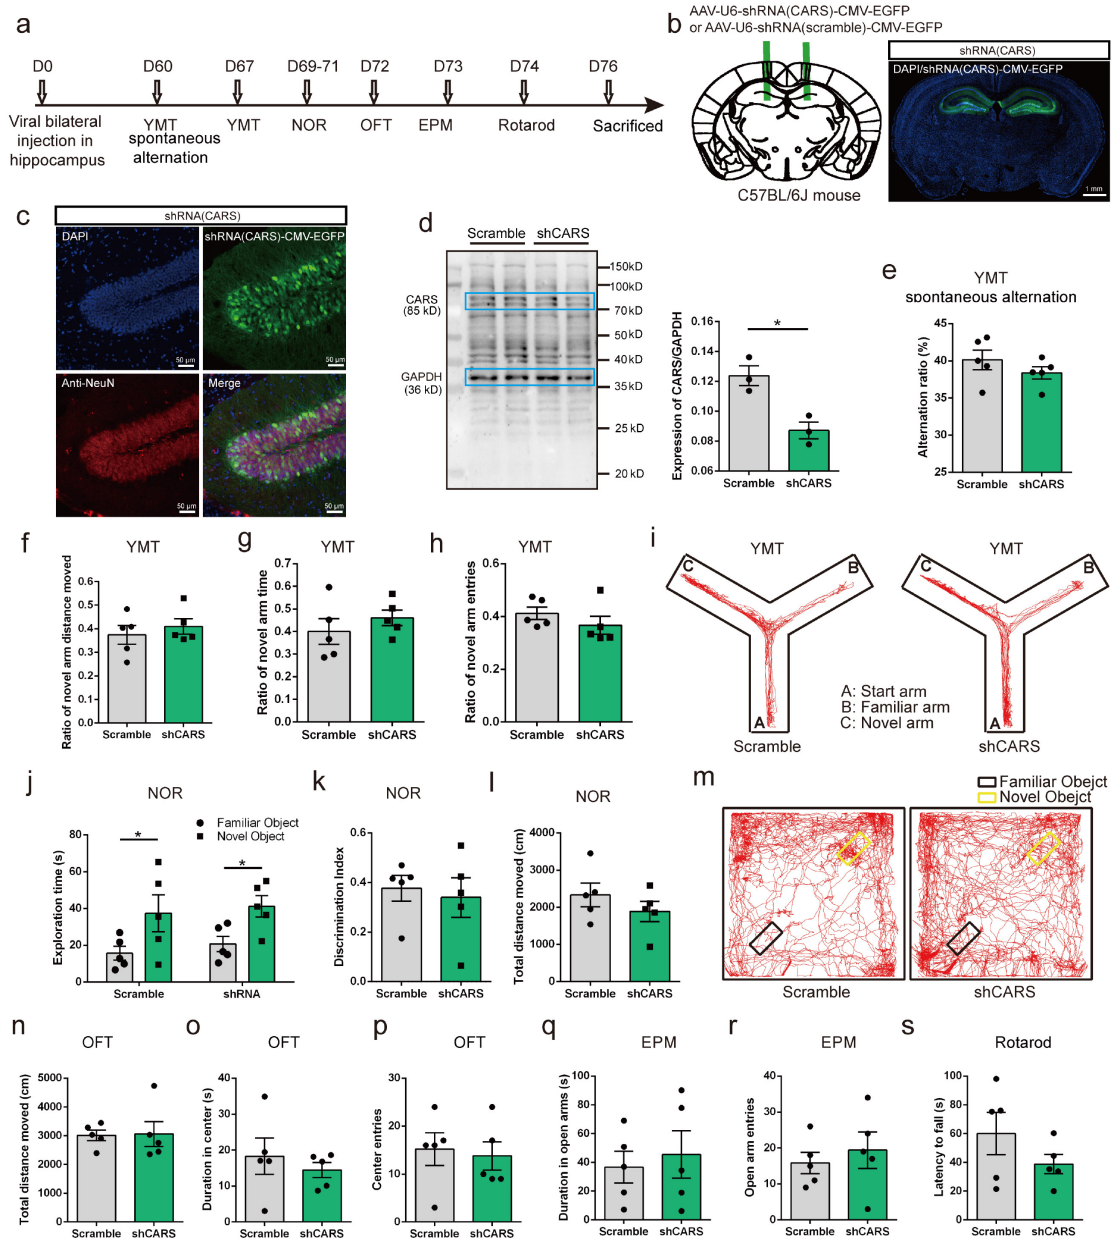

**Fig. S14 Knockdown of CARS in hippocampal neurons dose not affect memory of C57BL/6J**

**mice.** **a** The schedule of viral injection and the following behavioral tests. **b** Left: bilateral injection of AAV-U6-shRNA(CARS)-CMV-EGFP (shCARS) or AAV-U6-shRNA(scramble)-CMV-EGFP (scramble) into the hippocampus of C57BL/6J mice. Right: a representative image of infected hippocampus; scale bar: 1 mm. **c** Immunostaining of NeuN in the hippocampus after the expression of shCARS; scale bars: 50  $\mu$ m. **d** Left, western blotting of CARS protein expression in the hippocampus of scramble or shCARS mice. Right, quantification of CARS protein expression in



the hippocampus. **e** Spontaneous alternation behavior determined by Y-maze test (YMT). **f–h** Ratios of distance moved (**f**), time spent (**g**) and entries (**h**) in the novel arm in the YMT. **i** Representative activity traces of scramble and shCARS mice in the YMT. **j–l** The exploration time towards familiar and novel objects (**j**), discrimination index (**k**) and total distance moved (**l**) in the novel object recognition (NOR) test. **m** Representative activity traces of scramble and shCARS mice in the NOR test. **n–p** The total distance moved (**n**), time spent (**o**) and entries (**p**) in the center area in the open field test (OFT). **q** and **r** The time (**q**) and entries (**r**) in the open arms in the elevated plus maze (EPM) test. **s** The average latency to fall in the rotarod test. Data are shown as mean  $\pm$  SEM; \* $p < 0.05$ .

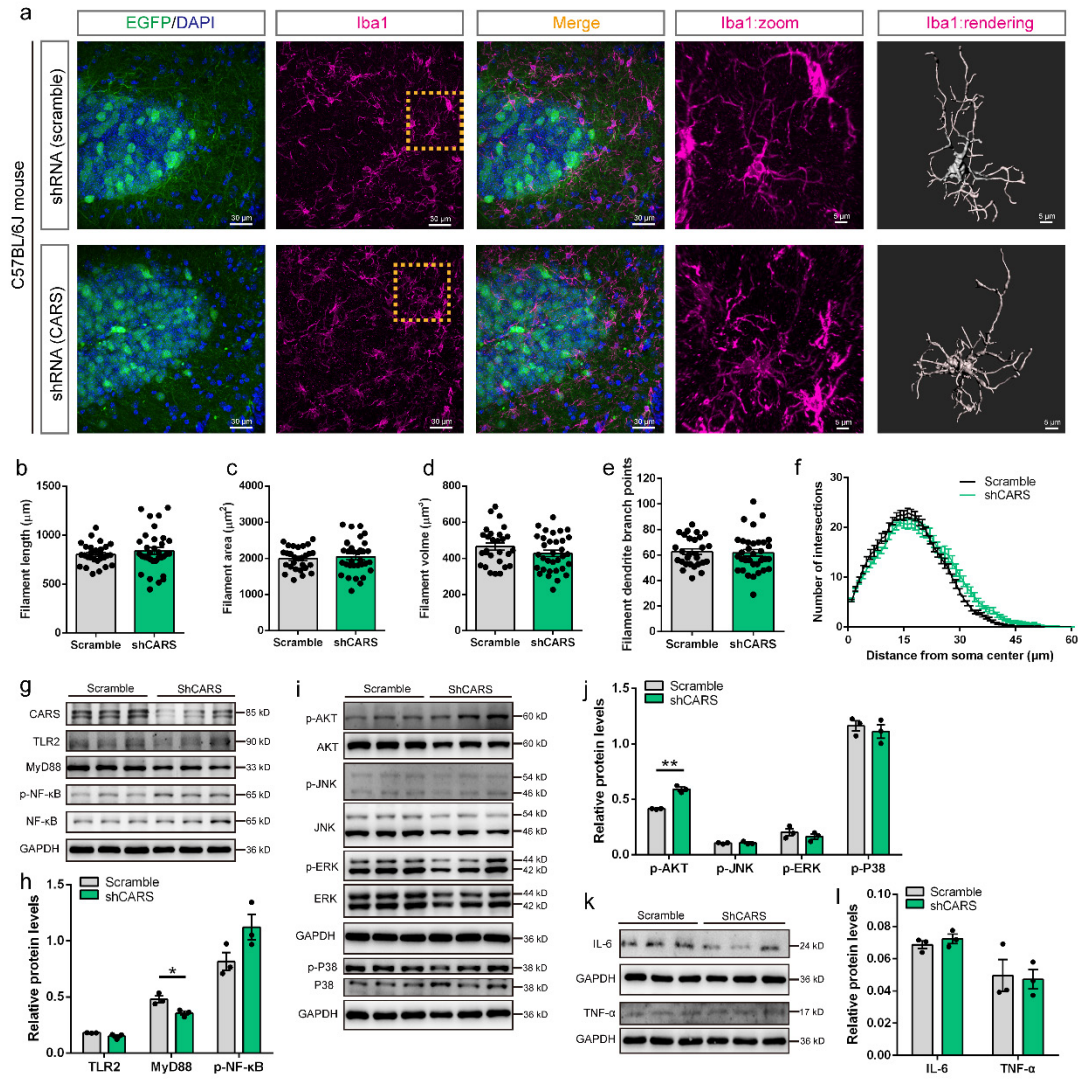

**Fig. S15 Knockdown of CARS in hippocampal neurons induces downregulation of the TLR2/MyD88 pathway, while does not affect microglial morphology in hippocampus of C57BL/6J mice.** **a** Representative images of Iba1 immunostaining (pink) and three-dimensional (3D) reconstruction (gray) of microglia in the hippocampus from C57BL/6J mice treated with AAV-U6-shRNA(CARS)-CMV-EGFP (shCARS) or AAV-U6-shRNA(scramble)-CMV-EGFP (scramble). Zoomed in view and rendering are shown in the right two panels respectively. Scale bars: 30  $\mu$ m (overview) and 5  $\mu$ m (zoomed in view and rendering). **b–e** Imaris-based automated quantification of Iba1<sup>+</sup> microglial filament length (**b**), filament area (**c**), filament volume (**d**), and numbers of dendrite branch points (**e**) in the hippocampus from scramble and shCARS C57BL/6J mice. **f** Sholl

analysis of microglial morphology in scramble and shCARS C57BL/6J mice. **g** and **h** Representative western blotting images (**g**) and quantification (**h**) of TLR2, MyD88 and p-NF- $\kappa$ B protein expression in the hippocampus of scramble and shCARS mice. **i** and **j** Representative western blotting images (**i**) and quantification (**j**) of p-AKT, p-JNK, p-ERK and p-P38 protein expression in the hippocampus of scramble and shCARS mice. **k** and **l** Representative western blotting images (**k**) and quantification (**l**) of IL-6 and TNF- $\alpha$  protein expression in the hippocampus of scramble and shCARS mice. Data are shown as mean  $\pm$  SEM; \* $p < 0.05$ , \*\* $p < 0.01$ .

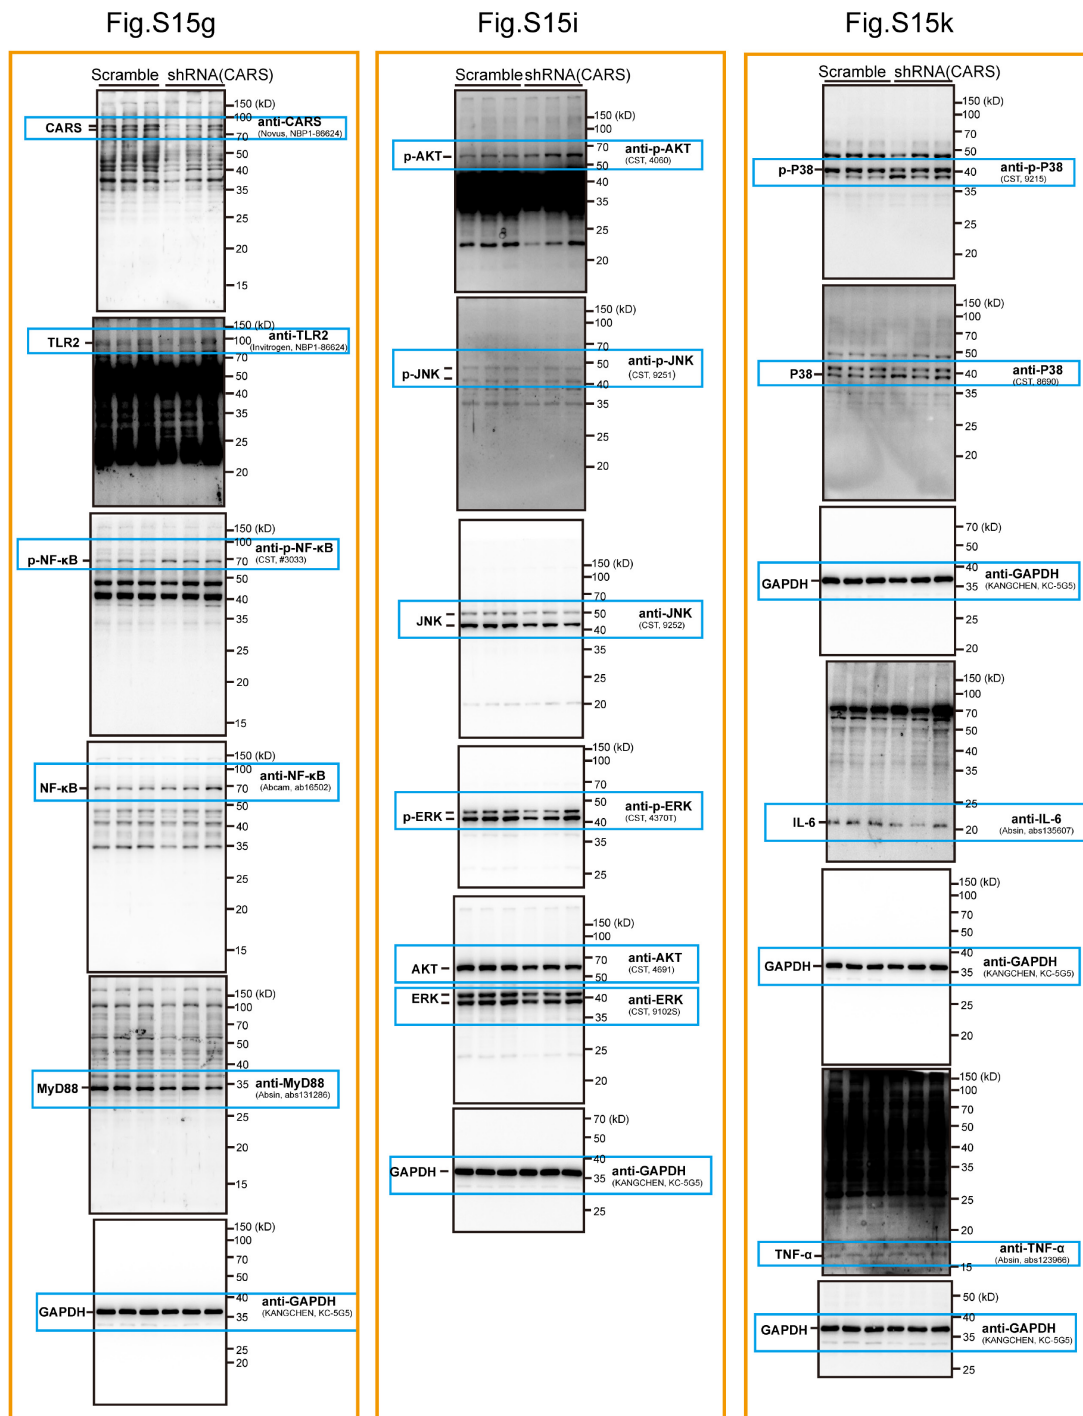

**Fig. S16** The unedited western blotting gels for Fig. S15g, S15i and S15k.

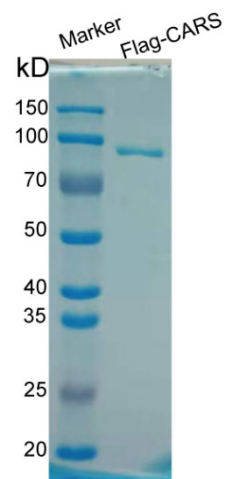

**Fig. S17 Purified Flag-tagged CARS.** Images showed the purified Flag-Tagged CARS on SDS-PAGE.

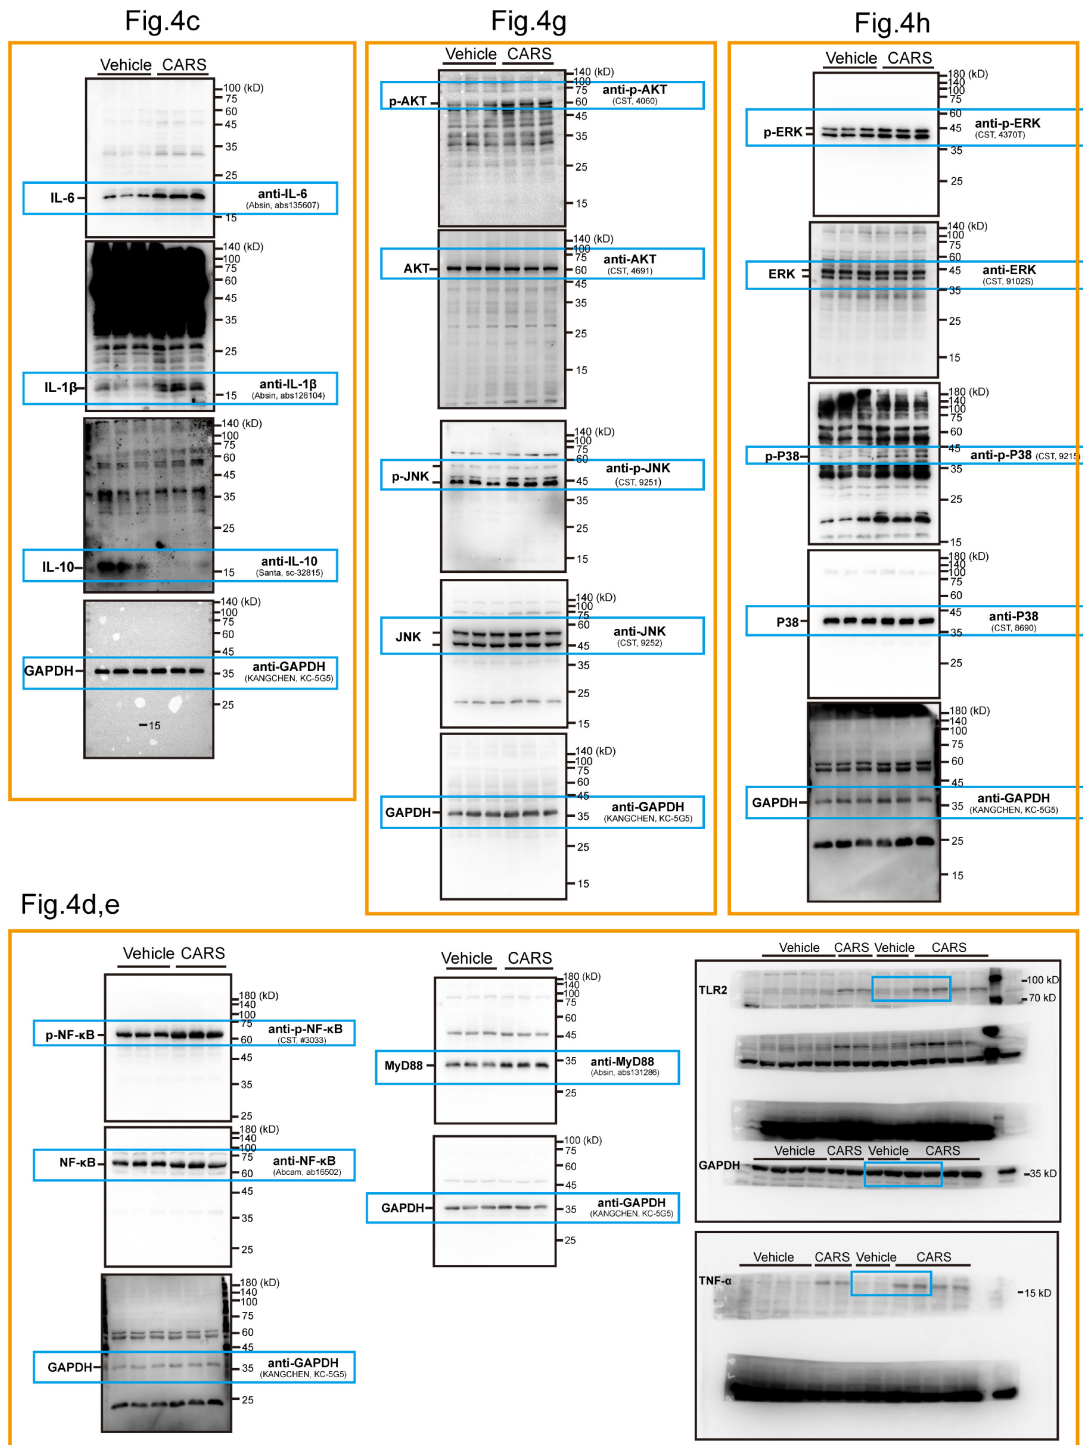

**Fig. S18 The unedited western blotting gels for Fig. 4c, 4d, 4e, 4g and 4h.**



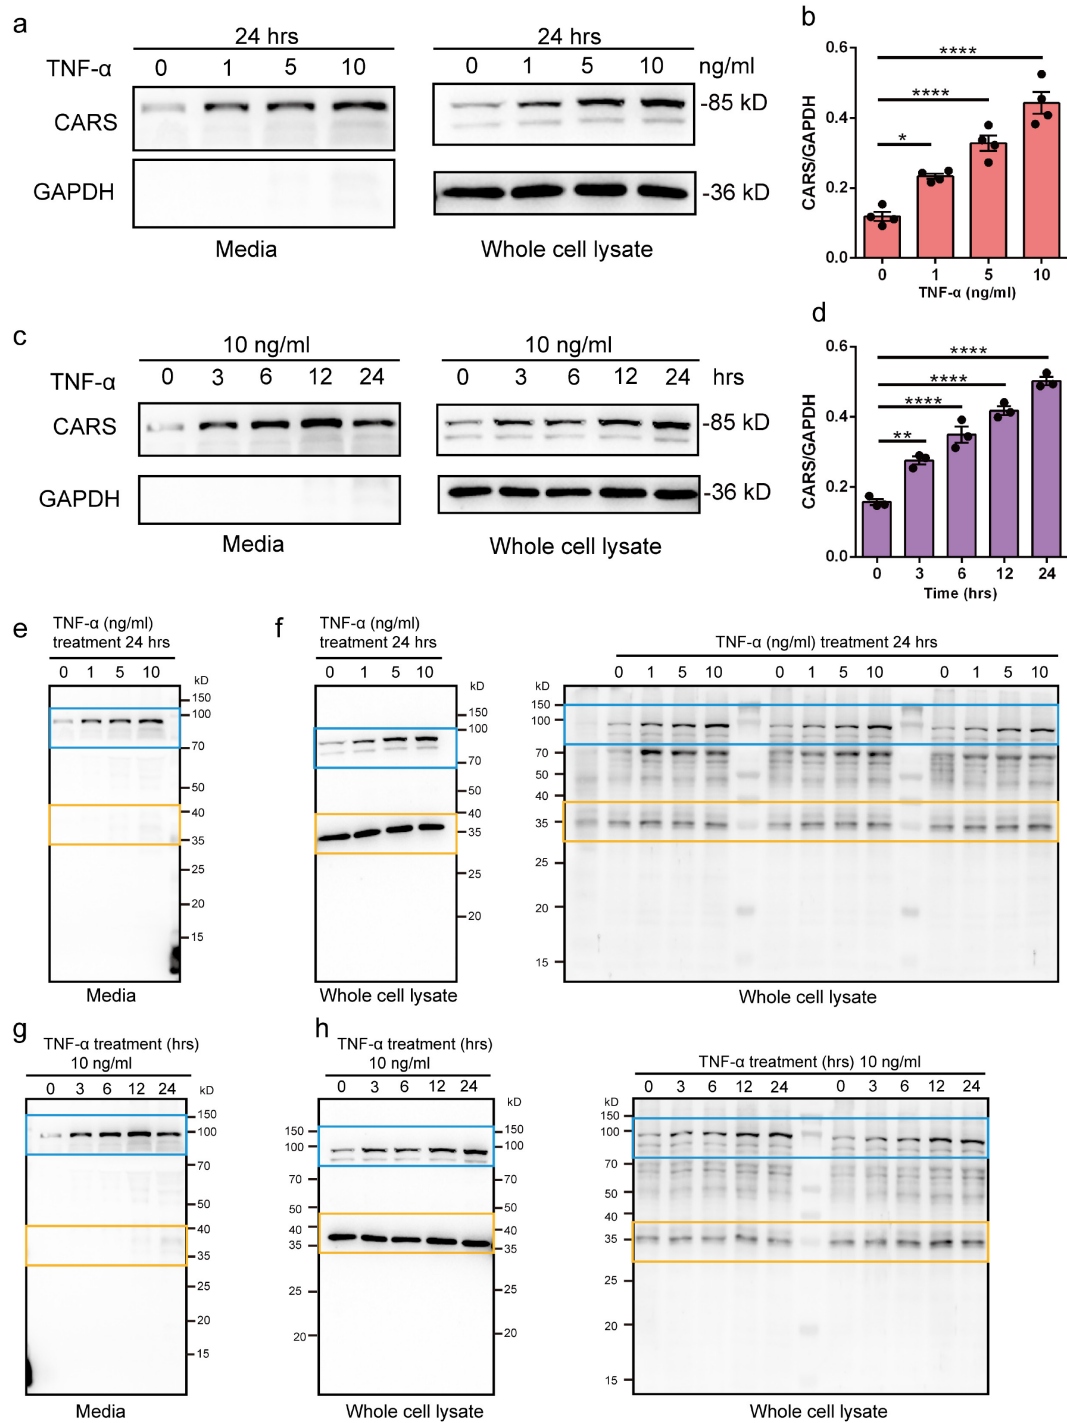

**Fig. S19 TNF- $\alpha$  treatment results in increased levels of CARS protein expression. a and b** Representative western blotting images (a) and quantification (b) of CARS protein levels in whole cell lysate of SHSY5Y cells treated with different dose of TNF- $\alpha$  (0, 1, 5 and 10 ng/ml) for 24 h. **c and d** Representative western blotting images (c) and quantification (d) of CARS protein levels in whole cell lysate of SHSY5Y cells treated with TNF- $\alpha$  (10 ng/ml) for different

time periods (0, 3, 6, 12 and 24 h). **e–h** The unedited western blotting gels for **a–d**. Data are shown as mean  $\pm$  SEM; \* $p < 0.05$ , \*\*  $p < 0.01$ , \*\*\*\*\* $p < 0.0001$ .

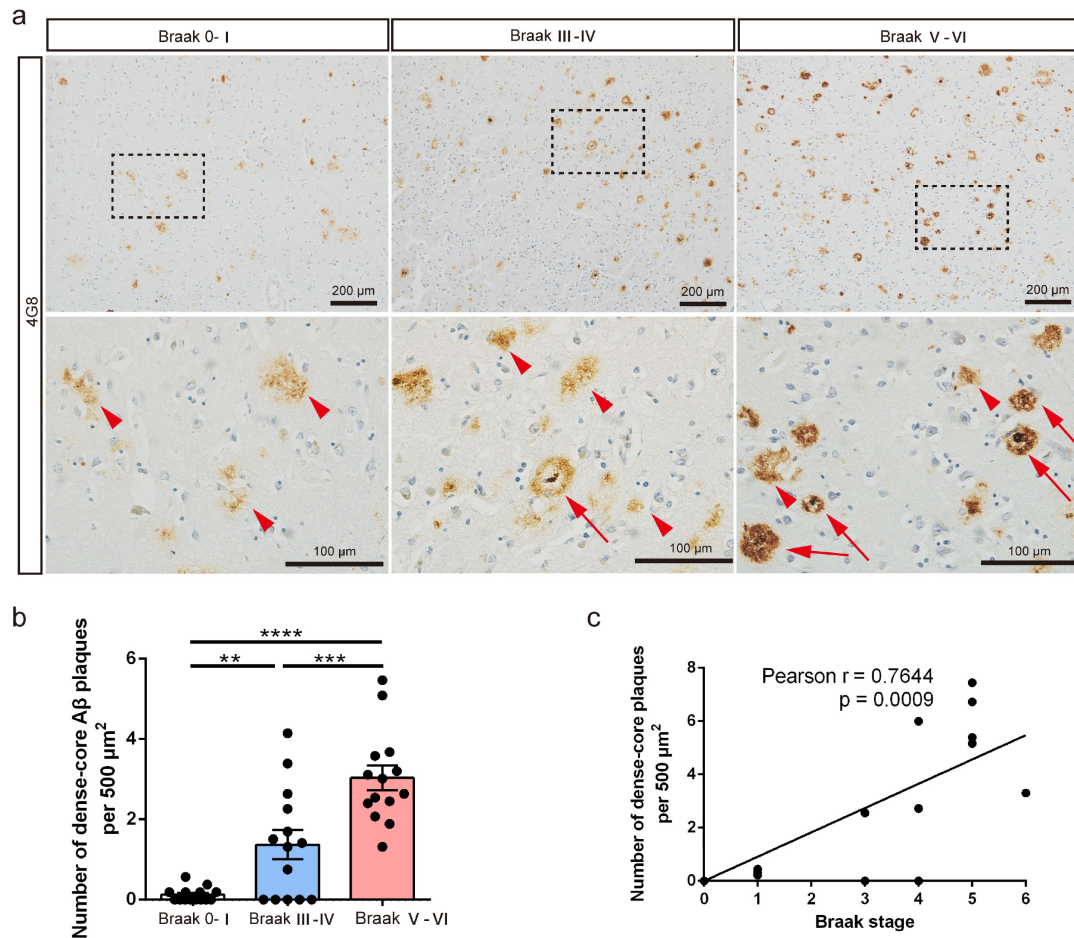

**Fig. S20 Increased dense-core A $\beta$  plaques in AD.** **a** Representative images showing 4G8 (anti- $\beta$ -amyloid antibody) labeled A $\beta$  plaques in the temporal cortex of subjects with Braak stages. Magnifications of black dotted boxes in the upper panels are shown in the lower panels. Red arrowheads denote diffusive A $\beta$  plaques, red arrows denote dense-core A $\beta$  plaques. Scale bars: upper, 200  $\mu$ m; lower, 100  $\mu$ m. **b** Quantification of the density of dense-core plaques. **c** Correlation between the density of dense-core plaques in the temporal cortex and Braak stage of control and AD subjects. Data are shown as mean  $\pm$  SEM; \*\* $p$  < 0.01, \*\*\* $p$  < 0.001, \*\*\*\* $p$  < 0.0001.

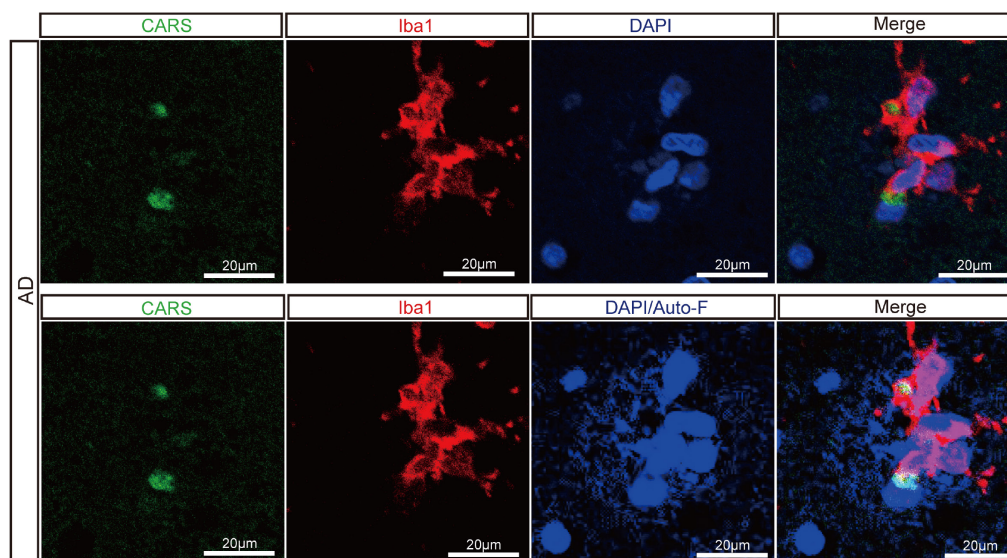

**Fig. S21 CARS is accumulated within dense-core A $\beta$  plaques along with recruitment of amoeboid microglial cells in AD.** Upper panels: Representative images of immunostaining for CARS (green), Iba1 (red), and DAPI (blue) in the AD human temporal cortex. Lower panels: Representative images of the autofluorescence (auto-F, blue) of dense-core A $\beta$  plaque excited at 405 nm and immunostaining for CARS (green), Iba1 (red), and DAPI (blue) in the AD human temporal cortex. Scale bars: 20  $\mu$ m.
